# Supplementary material for: Postnatal Deletion of Bmal1 in Cardiomyocyte Promotes Pressure Overload Induced Cardiac Remodeling in Mice
Source: PubMed Central journal article supplement — J Am Heart Assoc. 2022 Jun 22;11(13):e025021. doi: 10.1161/JAHA.121.025021 (PMC9333388; doi:10.1161/jaha.121.025021), 2022-06-22
Supplement: JAH3-11-e025021-s001.pdf [file JAH3-11-e025021-s001.pdf]

# **Supplemental Material**

**Table S1. Echocardiographic analysis of cardiac function of the Ctrl and cKO mice at 15 weeks age.**

| <b>Groups</b> | <b>Ctrl (n=5)</b> | <b>cKO (n=5)</b> |
|---------------|-------------------|------------------|
| EF(%)         | 61.85 ± 5.633     | 64.24 ± 6.11     |
| FS(%)         | 33.52 ± 4.181     | 35.43 ± 4.716    |
| LVAW;d(mm)    | 0.8815 ± 0.01271  | 0.842 ± 0.05287  |
| LVAW;s(mm)    | 1.262 ± 0.08974   | 1.377 ± 0.04749  |
| LVPW;d(mm)    | 0.7654 ± 0.06403  | 0.8728 ± 0.05736 |
| LVPW;s(mm)    | 1.132 ± 0.09744   | 1.209 ± 0.05877  |
| LVID;d(mm)    | 3.984 ± 0.07778   | 3.912 ± 0.05916  |
| LVID;s(mm)    | 2.66 ± 0.211      | 2.53 ± 0.2012    |
| LV Vol;d(μl)  | 69.49 ± 3.163     | 66.5 ± 2.325     |
| LV Vol;s(μl)  | 27.15 ± 4.855     | 23.99 ± 4.529    |

EF: Ejection fraction; FS: Shortening fraction; LVAW: Left ventricular anterior wall; LVPW: Left ventricular posterior wall; LVID: Left ventricular internal diameter; LV Vol: Left ventricle volume; d: end-diastolic; s: end-systolic.  
Data were presented as mean ± SEM.

**Table S2.Echocardiographic analysis of cardiac function of the mice after 2 weeks TAC surgery**

| Groups       | Ctrl (n=4)       | cKO (n=4)        | Ctrl (n=11)      | cKO (n=9)          |
|--------------|------------------|------------------|------------------|--------------------|
|              | sham             |                  | TAC              |                    |
| EF(%)        | 63.25 ± 4.358    | 74.2 ± 3.534     | 67.02 ± 3.376    | 67.23 ± 4.833      |
| FS(%)        | 34.09 ± 3.15     | 42.77 ± 3.147    | 37.42 ± 2.741    | 37.79 ± 3.556      |
| LVAW;d(mm)   | 0.8935 ± 0.02435 | 0.9769 ± 0.04683 | 1.072 ± 0.0545   | 1.317 ± 0.07619 #* |
| LVAW;s(mm)   | 1.444 ± 0.09259  | 1.532 ± 0.06736  | 1.599 ± 0.05973  | 1.86 ± 0.09672 *   |
| LVPW;d(mm)   | 0.8287 ± 0.06159 | 0.9167 ± 0.07112 | 0.9596 ± 0.04162 | 1.132 ± 0.05314 #* |
| LVPW;s(mm)   | 1.181 ± 0.0456   | 1.245 ± 0.1308   | 1.423 ± 0.0782   | 1.562 ± 0.07251 #  |
| LVID;d(mm)   | 3.935 ± 0.0857   | 3.773 ± 0.1499   | 3.929 ± 0.1073   | 3.811 ± 0.1097     |
| LVID;s(mm)   | 2.597 ± 0.1552   | 2.162 ± 0.1524   | 2.48 ± 0.159     | 2.391 ± 0.1904     |
| LV Vol;d(μl) | 67.48 ± 3.406    | 61.36 ± 5.84     | 67.85 ± 4.281    | 63 ± 4.116         |
| LV Vol;s(μl) | 24.99 ± 3.57     | 15.92 ± 2.552    | 23.42 ± 3.446    | 21.75 ± 4.294      |

EF: Ejection fraction; FS: Shortening fraction; LVAW: Left ventricular anterior wall; LVPW: Left ventricular posterior wall; LVID: Left ventricular internal diameter; LV Vol: Left ventricle volume; d: end-diastolic; s: end-systolic.  
Data were presented as mean ± SEM. #p<0.05, ##p<0.01 vs. Sham. \*p<0.05 vs. Ctrl.

**Table S3. Echocardiographic analysis of cardiac function of the mice after 4 weeks TAC surgery**

| Groups       | Ctrl (n=9)       | cKO (n=7)        | Ctrl (n=10)         | cKO (n=14)              |
|--------------|------------------|------------------|---------------------|-------------------------|
|              | sham             |                  | TAC                 |                         |
| EF(%)        | 65.64 ± 4.755    | 57.81 ± 3.985    | 43.53 ± 5.12 ##     | 51.21 ± 3.491           |
| FS(%)        | 36.57 ± 3.54     | 30.47 ± 2.676    | 21.99 ± 3.213 ##    | 26.5 ± 2.399            |
| LVAW;d(mm)   | 0.8594 ± 0.0603  | 1.004 ± 0.07623  | 1.286 ± 0.07231 ### | 1.375 ± 0.04343 ###     |
| LVAW;s(mm)   | 1.376 ± 0.08266  | 1.504 ± 0.07069  | 1.692 ± 0.1258      | 1.809 ± 0.04122 ###     |
| LVPW;d(mm)   | 0.8189 ± 0.05127 | 0.8448 ± 0.03847 | 1.023 ± 0.04839 ##  | 1.306 ± 0.0402 ### ***  |
| LVPW;s(mm)   | 1.261 ± 0.0755   | 1.164 ± 0.08355  | 1.223 ± 0.06281     | 1.665 ± 0.05578 ### *** |
| LVID;d(mm)   | 3.843 ± 0.09253  | 4.076 ± 0.1358   | 4.165 ± 0.09444 #   | 4.18 ± 0.09596          |
| LVID;s(mm)   | 2.456 ± 0.1819   | 2.841 ± 0.1721   | 3.271 ± 0.1927 ##   | 3.095 ± 0.1542          |
| LV Vol;d(μl) | 64.1 ± 3.651     | 73.92 ± 5.721    | 77.59 ± 4.02 #      | 78.51 ± 4.25            |
| LV Vol;s(μl) | 22.99 ± 4.126    | 31.76 ± 4.917    | 45.34 ± 5.733 ##    | 39.74 ± 4.253           |

EF: Ejection fraction; FS: Shortening fraction; LVAW: Left ventricular anterior wall; LVPW: Left ventricular posterior wall; LVID: Left ventricular internal diameter; LV Vol: Left ventricle volume; d: end-diastolic; s: end-systolic.

Data were presented as mean ± SEM. #p<0.05, ##p<0.01, ###p<0.001 vs. Sham. \*\*\*p<0.001 vs. Ctrl.

**Table S4. Echocardiographic analysis of cardiac function of the mice after 4 weeks Ang II infusion**

| Groups       | Ctrl (n=7)       | cKO (n=5)          | Ctrl (n=7)       | cKO (n=5)                  |
|--------------|------------------|--------------------|------------------|----------------------------|
|              | Basic            |                    | Ang II           |                            |
| EF(%)        | 65.11 ± 2.578    | 69.86 ± 3.698      | 57.25 ± 2.883    | 68.4 ± 3.861 *             |
| FS(%)        | 35.27 ± 1.891    | 39.09 ± 2.998      | 29.8 ± 1.97      | 37.78 ± 3.177 *            |
| LVAW;d(mm)   | 0.9797 ± 0.04656 | 0.949 ± 0.04795    | 0.9383 ± 0.03923 | 1.315 ± 0.04046 ###<br>*** |
| LVAW;s(mm)   | 1.483 ± 0.04606  | 1.551 ± 0.06814    | 1.418 ± 0.09165  | 1.888 ± 0.05947 ## **      |
| LVPW;d(mm)   | 0.7826 ± 0.04072 | 0.9358 ± 0.02044 * | 0.8977 ± 0.07116 | 1.172 ± 0.07726 # *        |
| LVPW;s(mm)   | 1.197 ± 0.05854  | 1.367 ± 0.07089    | 1.256 ± 0.09304  | 1.571 ± 0.1193             |
| LVID;d(mm)   | 3.802 ± 0.1127   | 3.707 ± 0.1703     | 3.898 ± 0.08539  | 3.473 ± 0.1284 *           |
| LVID;s(mm)   | 2.464 ± 0.1185   | 2.278 ± 0.2112     | 2.737 ± 0.1012   | 2.172 ± 0.1709 *           |
| LV Vol;d(μl) | 62.53 ± 4.445    | 59.14 ± 6.398      | 66.11 ± 3.501    | 50.35 ± 4.397 *            |
| LV Vol;s(μl) | 22.05 ± 2.879    | 18.76 ± 4.095      | 28.33 ± 2.509    | 16.38 ± 2.924 *            |

EF: Ejection fraction; FS: Shortening fraction; LVAW: Left ventricular anterior wall; LVPW: Left ventricular posterior wall; LVID: Left ventricular internal diameter; LV Vol: Left ventricle volume; d: end-diastolic; s: end-systolic.

Data were presented as mean ± SEM. #p<0.05, ##p<0.01, ###p<0.001 vs. Basic. \*p<0.05, \*\*p<0.01, \*\*\*p<0.001 vs. Ctrl.

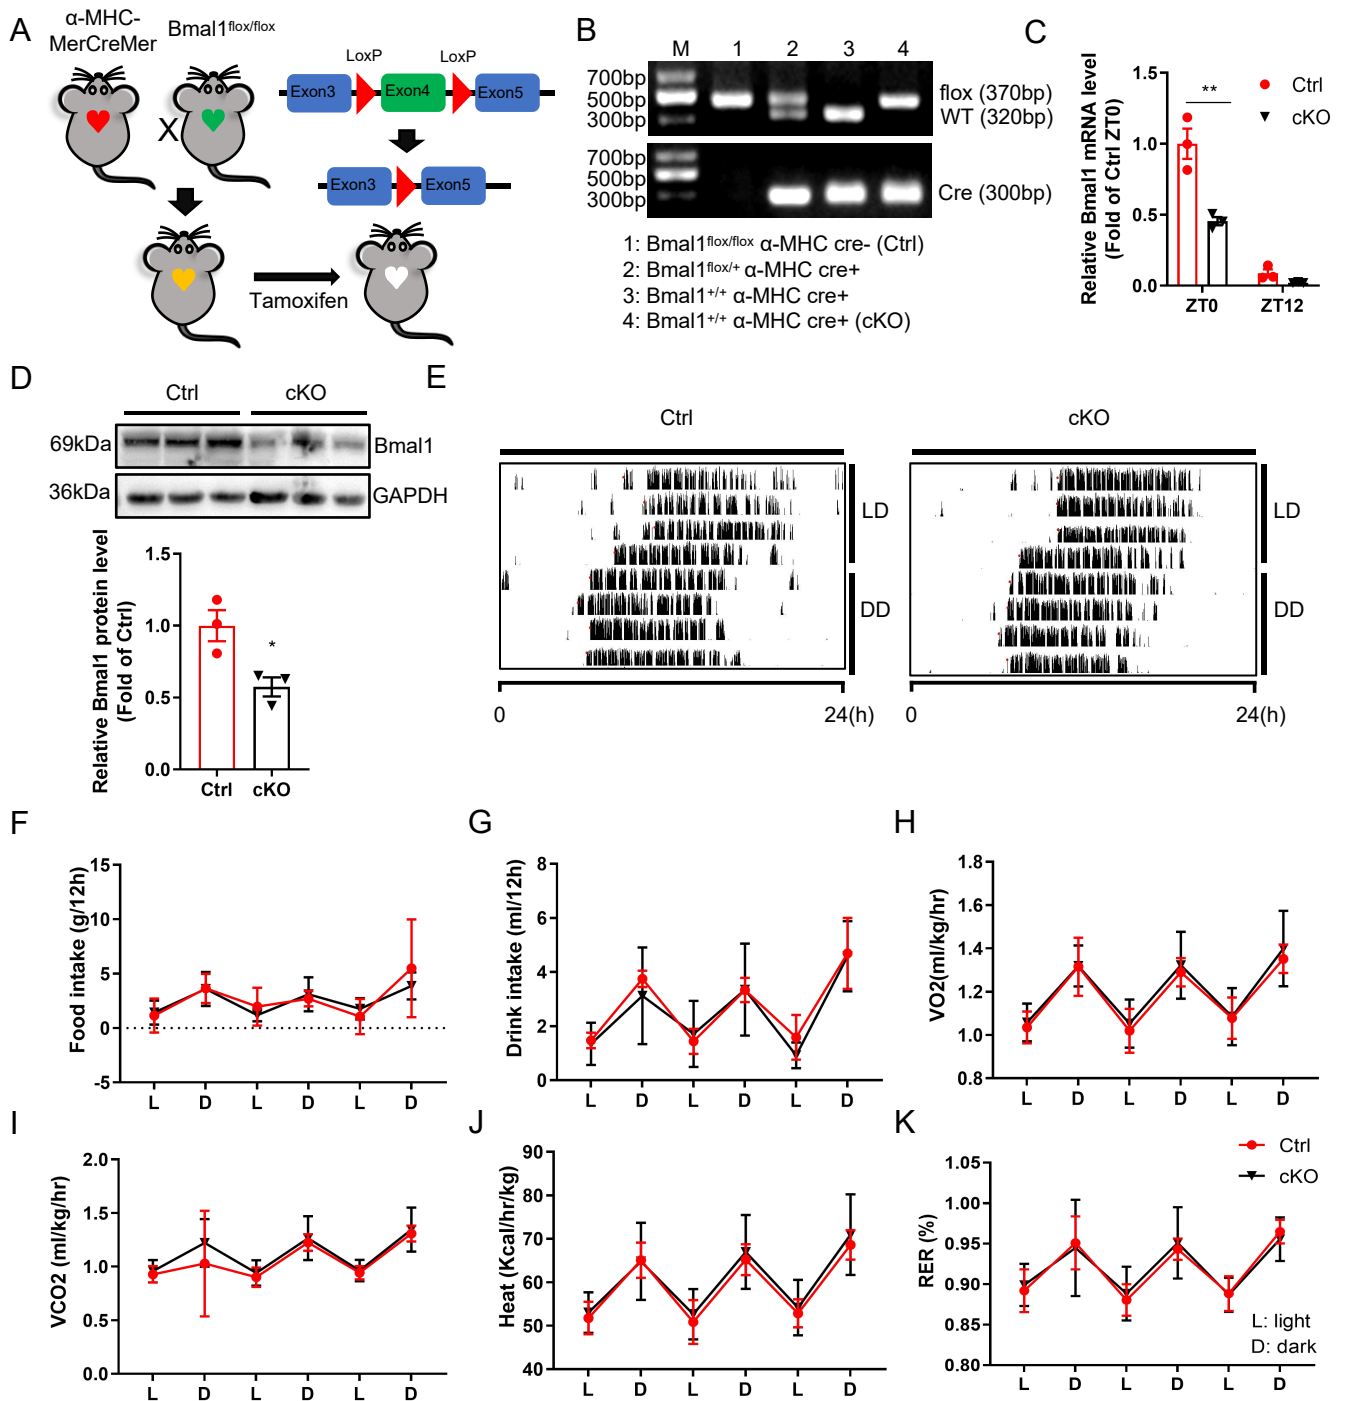

**Figure S1. Generation and characterization of the cKO mice.**

**A.** Schematic showing the generation of inducible cardiomyocyte specific  $Bmal1$  knockout (cKO mice. The locations of loxP sites flanked the exon 4 of the  $Bmal1$  gene.

**B.** Genotyping tests show the bands for  $Bmal1$  flox (370bp),  $Bmal1^{+/+}$  (320bp), and the  $\alpha$ -MHC-Cre (300bp).

**C.**  $Bmal1$  mRNA expression in the heart tissues measured at ZT0 (light on) and ZT12 (light off).  $n=3$  mice per group.

**D.**  $Bmal1$  protein expression in the heart tissues measured at ZT0.  $n=3$  mice per group.

**E.** Representative double-plotted actograms of wheel-running activity of the cKO and Ctrl mice.

**F-K.** Circadian rhythms of food intake, drink intake, oxygen consumption ( $VO_2$ ), carbon dioxide production ( $VCO_2$ ), heat production and respiratory exchange ratio (RER) of the cKO and Ctrl mice.  $n=4-5$  mice per group. Data were presented as mean  $\pm$  SEM, \* $p<0.05$ , \*\* $p<0.01$  vs. Ctrl.

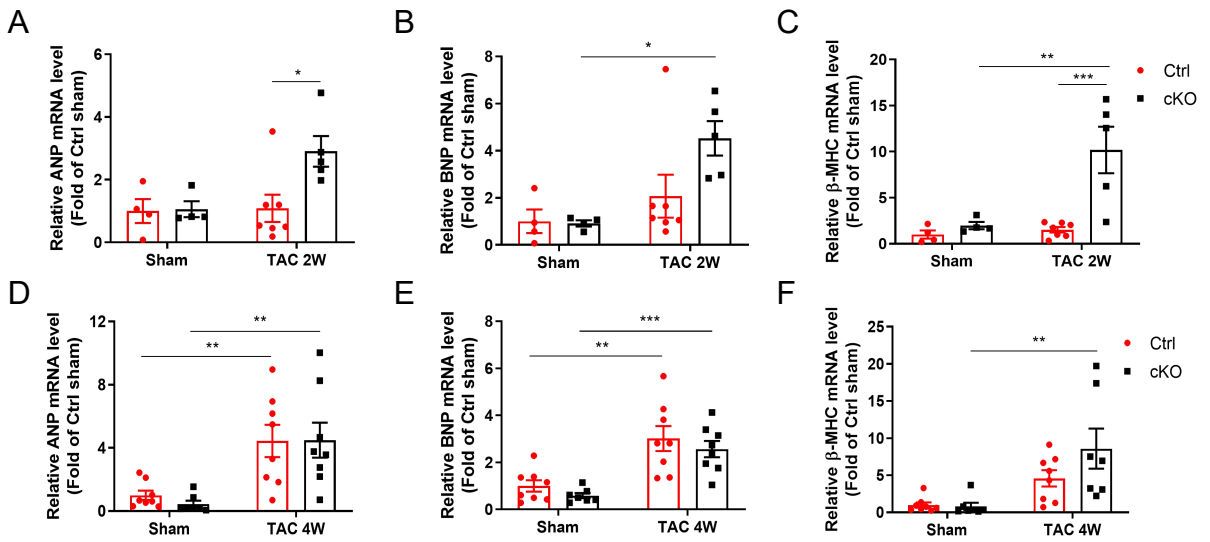

**Figure S2. Hypertrophy related gene expression in Ctrl and cKO mice after TAC surgery.**

**A-C.** qRT-PCR analysis of the mRNA levels of ANP, BNP and β-MHC in the hearts of Ctrl and cKO mice in response to 2 weeks TAC surgery. n=4-7 mice per group.

**D-F.** qRT-PCR analysis of the mRNA levels of ANP, BNP and β-MHC in the hearts of Ctrl and cKO mice in response to 4 weeks TAC surgery. n=7-8 mice per group.

Data were presented as mean ± SEM, \*p<0.05, \*\*p<0.01, \*\*\*p<0.001.

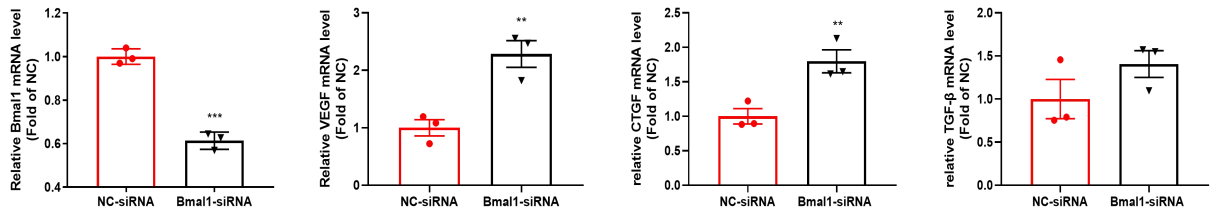

**Figure S3. Silencing Bmal1 in cardiomyocytes promotes fibrogenic gene expression in neonatal rat ventricular cardiomyocytes (NRVMs).** NRVMs were transfected with negative control (NC) or Bmal1 siRNA for 24h and treated with PE for 6h. Bmal1, VEGF, CTGF and TGFβ mRNA expression was determined by qRT-PCR. n=3 per group.
